# Supplementary material for: Weighted gene coexpression network analysis identifies the key role associated with acute coronary syndrome
Source: publisher site journal article supplement (doi:10.18632/aging.103859), 2020-10-14
Supplement: Supplementary file [file aging-v12i19-103859-supplementary-material-SD3.pdf]

## SUPPLEMENTARY TABLE

Supplementary Table 3. The primer of CXCR5 and CCR7.

| Gene  | Forward primer                | Reverse primer       |
|-------|-------------------------------|----------------------|
| CCR7  | GGGCCCA GCA GGA A C T T A T T | GTCAGAGCGGGCTTTCTCTA |
| CXCR5 | ACATCCTTTGCCA GA GT CCG       | AACTCTTAAAGGGCGGGAGC |
