# Supplementary material for: Weighted gene coexpression network analysis identifies the key role associated with acute coronary syndrome
Source: Aging (Albany NY). 2020 Oct 14;12(19):19440–54. doi: 10.18632/aging.103859 (PMC7732301; doi:10.18632/aging.103859)
Supplement: Supplementary Table 1 [file aging-12-103859-s001..xlsx]

## Sheet: Supplementary
Supplementary Table 1: The details of color module genes.
Color	Symbol
darkred	LTB
darkred	HBB
darkred	ETS1
darkred	CCND2
darkred	CCL5
darkred	HBA2
darkred	PRKCH
darkred	CD2
darkred	PTPN4
darkred	ITM2A
darkred	KLRB1
darkred	SPOCK2
darkred	LIME1
darkred	GNLY
darkred	NELL2
darkred	CD247
darkred	LBH
darkred	KLRG1
darkred	GZMA
darkred	BCL2
darkred	SH2D1A
darkred	PCED1B
darkred	MAL
darkred	KLRF1
darkred	CD3D
darkred	PYHIN1
darkred	S1PR1
darkred	SH2D1B
darkred	IL7R
darkred	MATK
darkred	CST7
darkred	IL32
darkred	SLC38A1
darkred	LEF1
darkred	PRF1
darkred	CD7
darkred	CD8A
darkred	GZMK
darkred	GZMH
darkred	STAT4
darkred	CCR7
darkred	ITK
darkred	ADGRG1
darkred	IL2RB
darkred	HOPX
darkred	PASK
darkred	SBK1
darkred	LAT
darkred	LTA
darkred	TGFBR3
darkred	PRKCQ-AS1
darkred	CD6
darkred	GZMB
darkred	FAM102A
darkred	CD96
darkred	SYTL2
darkred	SKAP1
darkred	KLRD1
darkred	PLCG1
darkred	PRKCQ
darkred	AUTS2
darkred	BCL11B
darkred	PLEKHF1
darkred	ABLIM1
darkred	MAGEE1
darkred	TRABD2A
darkred	RASGRP1
darkred	TRAT1
darkred	SOCS2
darkred	DHRS3
darkred	FGFBP2
darkred	SAMD3
darkred	TARP
darkred	CD3G
darkred	LRFN3
darkred	GZMM
darkred	RORA
darkred	ZNF683
darkred	ATP8B2
darkred	CD27
darkred	PTGDS
darkred	CTSW
darkred	INPP4B
darkred	EOMES
darkred	TSPAN5
darkred	PKIA
darkred	PVRIG
darkred	KIF5C
darkred	NCALD
darkred	AXIN2
darkred	SYNE2
darkred	TMEM204
darkred	LAX1
darkred	IL18R1
darkred	IL18RAP
darkred	PI16
darkred	LINC00892
darkred	LOC100505501
darkred	MYBL1
darkred	CD3E
darkred	SIRPG
darkred	S1PR5
darkred	SLAMF1
darkred	CCDC65
darkred	TNFRSF25
darkred	TXK
darkred	CD160
darkred	VSIG1
darkred	NSG1
darkred	THEMIS
darkred	CLIC3
darkred	TMEM14A
darkred	CD226
darkred	CD40LG
darkred	CCR4
darkred	LRATD2
darkred	GRAP2
darkred	CD5
darkred	IFNG
darkred	ADTRP
darkred	TC2N
orange	CD79B
orange	CD79A
orange	PIM2
orange	BIN1
orange	IGLL1
orange	SEL1L3
orange	RUBCNL
orange	OCIAD2
orange	FCMR
orange	SLAMF6
orange	TLR10
orange	GNG7
orange	FCER2
orange	PRDM8
orange	CDK14
orange	CARD11
orange	E2F5
orange	PDLIM1
orange	PTPRCAP
orange	PPP1R16B
orange	FCRLA
orange	BCAS4
orange	BANK1
orange	CD69
orange	IGKV1ORY-1
orange	SLC2A1
orange	JCHAIN
orange	TENT5C
orange	FCRL2
orange	MS4A1
orange	CD24
orange	HLA-DOB
orange	BTLA
orange	COBLL1
orange	STRBP
orange	SPRY1
orange	2020-03-03
orange	TCL1A
orange	TRAF5
orange	LPAR5
orange	CD22
orange	TRIB2
orange	ADGRG5
orange	CXCR5
orange	BEX2
orange	TPD52
orange	TSPAN13
orange	STAP1
orange	NIBAN3
orange	CD19
orange	ID3
orange	ILDR1
orange	CLC
orange	CD70
orange	KCNG1
orange	CD72
orange	P2RY10
orange	PIK3C2B
orange	VPREB3
orange	WEE1
orange	SPIB
orange	BACH2
orange	MGAT3
orange	WFDC21P
orange	DMWD
orange	RHOH
orange	BEND5
orange	SEMA4F
orange	LAMA5
orange	RALGPS2
orange	ALDH5A1
orange	RASGRP3
orange	DENND5B
orange	RRAS2
orange	POU2AF1
orange	HRK
orange	TLE1
orange	JAM3
orange	LINC00926
orange	DLEU1
orange	BLK
orange	IGLL3P
orange	RAB30
orange	TNFRSF13B
orange	MIR600HG
orange	IFNLR1
orange	PTPRK
orange	OSBPL10
orange	ALPL
orange	EBF1
orange	CNTNAP2
orange	CCDC102A
orange	TNFRSF13C
orange	SSPN
orange	NCR3
orange	RADX
orange	TNFRSF17
orange	NT5E
