# Supplementary material for: Weighted gene coexpression network analysis identifies the key role associated with acute coronary syndrome
Source: Aging (Albany NY). 2020 Oct 14;12(19):19440–54. doi: 10.18632/aging.103859 (PMC7732301; doi:10.18632/aging.103859)
Supplement: Supplementary Table 2 [file aging-12-103859-s002..xlsx]

## Sheet: GO-enrich
Supplementary Table 2: The Function analysis of color module genes
ONTOLOGY	ID	Description	GeneRatio	BgRatio	pvalue	p.adjust	qvalue	geneID	Count
BP	GO:0042110	T cell activation	37/194	443/17913	1.90759e-22	4.88533e-19	4.33524e-19	CCL5/CD2/BCL2/CD3D/IL7R/LEF1/CD7/CD8A/CCR7/ITK/LAT/CD6/PRKCQ/BCL11B/RASGRP1/CD3G/RORA/ZNF683/CD27/EOMES/LAX1/IL18R1/CD3E/SIRPG/CD160/THEMIS/CD40LG/GRAP2/IFNG/SLAMF6/CARD11/CD24/BTLA/CLC/CD70/RHOH/TNFRSF13C	37
BP	GO:0050851	antigen receptor-mediated signaling pathway	28/194	224/17913	7.55248e-22	9.67095e-19	8.58201e-19	PRKCH/LIME1/CD247/BCL2/CD3D/CCR7/ITK/LAT/SKAP1/PLCG1/PRKCQ/TRAT1/CD3G/PVRIG/LAX1/CD3E/TXK/CD160/THEMIS/CD226/GRAP2/CD79A/CARD11/MS4A1/CD22/STAP1/CD19/BLK	28
BP	GO:0002768	immune response-regulating cell surface receptor signaling pathway	31/194	434/17913	6.14676e-17	5.24729e-14	4.65644e-14	PRKCH/LIME1/CD247/BCL2/CD3D/CCR7/ITK/LAT/SKAP1/PLCG1/PRKCQ/TRAT1/CD3G/PVRIG/LAX1/CD3E/TXK/CD160/THEMIS/CD226/GRAP2/CD79A/CARD11/MS4A1/CD24/BTLA/CD22/STAP1/CD19/BLK/NCR3	31
BP	GO:0002429	immune response-activating cell surface receptor signaling pathway	29/194	399/17913	4.31409e-16	2.7621e-13	2.45109e-13	PRKCH/LIME1/CD247/BCL2/CD3D/CCR7/ITK/LAT/SKAP1/PLCG1/PRKCQ/TRAT1/CD3G/PVRIG/LAX1/CD3E/TXK/CD160/THEMIS/CD226/GRAP2/CD79A/CARD11/MS4A1/CD22/STAP1/CD19/BLK/NCR3	29
BP	GO:0002694	regulation of leukocyte activation	31/194	492/17913	2.0277e-15	1.03859e-12	9.21643e-13	CCL5/CD2/BCL2/IL7R/CST7/CCR7/LAT/CD6/PRKCQ/RASGRP1/RORA/ZNF683/CD27/LAX1/CD3E/SIRPG/CD160/CD226/CD40LG/GRAP2/IFNG/CARD11/BANK1/CD24/BTLA/CD22/STAP1/CD19/CLC/CD70/TNFRSF13C	31
BP	GO:0030098	lymphocyte differentiation	25/194	325/17913	1.48037e-14	6.3187e-12	5.60721e-12	CD2/ITM2A/BCL2/CD3D/IL7R/LEF1/CCR7/BCL11B/RASGRP1/RORA/ZNF683/CD27/EOMES/IL18R1/CD3E/THEMIS/CD40LG/IFNG/CD79A/SLAMF6/CARD11/MS4A1/TPD52/CD19/RHOH	25
BP	GO:0051249	regulation of lymphocyte activation	27/194	401/17913	3.14803e-14	1.15173e-11	1.02204e-11	CCL5/CD2/BCL2/IL7R/CCR7/LAT/CD6/PRKCQ/RASGRP1/ZNF683/CD27/LAX1/CD3E/SIRPG/CD160/CD40LG/GRAP2/IFNG/CARD11/BANK1/CD24/BTLA/CD22/CD19/CLC/CD70/TNFRSF13C	27
BP	GO:0050852	T cell receptor signaling pathway	19/194	180/17913	8.91305e-14	2.85329e-11	2.53201e-11	LIME1/CD247/CD3D/CCR7/ITK/LAT/SKAP1/PLCG1/PRKCQ/TRAT1/CD3G/PVRIG/CD3E/TXK/CD160/THEMIS/CD226/GRAP2/CARD11	19
BP	GO:1903039	positive regulation of leukocyte cell-cell adhesion	20/194	214/17913	1.97208e-13	5.61166e-11	4.97978e-11	ETS1/CCL5/IL7R/CCR7/CD6/SKAP1/PRKCQ/RASGRP1/CD27/CD3E/SIRPG/CD160/CD40LG/GRAP2/IFNG/CARD11/CD24/BTLA/CD70/TNFRSF13C	20
BP	GO:0050863	regulation of T cell activation	23/194	307/17913	3.1396e-13	8.04051e-11	7.13515e-11	CCL5/CD2/IL7R/CCR7/LAT/CD6/PRKCQ/RASGRP1/ZNF683/CD27/LAX1/CD3E/SIRPG/CD160/CD40LG/GRAP2/IFNG/CARD11/CD24/BTLA/CLC/CD70/TNFRSF13C	23
BP	GO:1903037	regulation of leukocyte cell-cell adhesion	22/194	295/17913	1.165e-12	2.66847e-10	2.368e-10	ETS1/CCL5/IL7R/CCR7/CD6/SKAP1/PRKCQ/RASGRP1/CD27/LAX1/CD3E/SIRPG/CD160/CD40LG/GRAP2/IFNG/ADTRP/CARD11/CD24/BTLA/CD70/TNFRSF13C	22
BP	GO:0007159	leukocyte cell-cell adhesion	23/194	328/17913	1.25036e-12	2.66847e-10	2.368e-10	ETS1/CCL5/IL7R/CCR7/CD6/SKAP1/PRKCQ/RASGRP1/CD27/LAX1/CD3E/SIRPG/CD160/CD40LG/GRAP2/IFNG/ADTRP/CARD11/CD24/BTLA/CD70/TNFRSF13C/NT5E	23
BP	GO:0002696	positive regulation of leukocyte activation	22/194	305/17913	2.27013e-12	4.47215e-10	3.96859e-10	CCL5/CD2/BCL2/IL7R/CCR7/CD6/PRKCQ/RASGRP1/CD27/CD3E/SIRPG/CD160/CD226/CD40LG/GRAP2/IFNG/CARD11/CD24/BTLA/STAP1/CD70/TNFRSF13C	22
BP	GO:0022409	positive regulation of cell-cell adhesion	20/194	251/17913	3.88963e-12	7.11524e-10	6.31407e-10	ETS1/CCL5/IL7R/CCR7/CD6/SKAP1/PRKCQ/RASGRP1/CD27/CD3E/SIRPG/CD160/CD40LG/GRAP2/IFNG/CARD11/CD24/BTLA/CD70/TNFRSF13C	20
BP	GO:0031343	positive regulation of cell killing	11/194	50/17913	4.67536e-12	7.9824e-10	7.08358e-10	SH2D1A/PRF1/RASGRP1/IL18RAP/CD160/CD226/IFNG/SLAMF6/FCER2/STAP1/NCR3	11
BP	GO:0050870	positive regulation of T cell activation	18/194	198/17913	5.34617e-12	8.34106e-10	7.40186e-10	CCL5/IL7R/CCR7/CD6/PRKCQ/RASGRP1/CD27/CD3E/SIRPG/CD160/CD40LG/GRAP2/IFNG/CARD11/CD24/BTLA/CD70/TNFRSF13C	18
BP	GO:0050867	positive regulation of cell activation	22/194	319/17913	5.53682e-12	8.34106e-10	7.40186e-10	CCL5/CD2/BCL2/IL7R/CCR7/CD6/PRKCQ/RASGRP1/CD27/CD3E/SIRPG/CD160/CD226/CD40LG/GRAP2/IFNG/CARD11/CD24/BTLA/STAP1/CD70/TNFRSF13C	22
BP	GO:0032609	interferon-gamma production	14/194	105/17913	7.38287e-12	1.05042e-09	9.32141e-10	CD2/CCR7/ITK/LTA/CD96/RASGRP1/EOMES/IL18R1/IL18RAP/CD3E/TXK/CD160/SLAMF6/TNFRSF13C	14
BP	GO:0002449	lymphocyte mediated immunity	21/194	293/17913	8.34943e-12	1.12542e-09	9.98694e-10	SH2D1A/SH2D1B/IL7R/PRF1/LTA/GZMB/CD96/KLRD1/RASGRP1/GZMM/CD27/IL18R1/IL18RAP/CD160/CD226/CD40LG/SLAMF6/FCER2/CD19/CLC/NCR3	21
BP	GO:0030217	T cell differentiation	19/194	234/17913	9.91553e-12	1.26968e-09	1.12672e-09	CD2/BCL2/CD3D/IL7R/LEF1/CCR7/BCL11B/RASGRP1/RORA/ZNF683/CD27/EOMES/IL18R1/CD3E/THEMIS/IFNG/SLAMF6/CARD11/RHOH	19
BP	GO:0022407	regulation of cell-cell adhesion	23/194	389/17913	4.06379e-11	4.95589e-09	4.39786e-09	ETS1/CCL5/IL7R/CCR7/CD6/SKAP1/PRKCQ/RASGRP1/LRFN3/CD27/LAX1/CD3E/SIRPG/CD160/CD40LG/GRAP2/IFNG/ADTRP/CARD11/CD24/BTLA/CD70/TNFRSF13C	23
BP	GO:0051251	positive regulation of lymphocyte activation	19/194	258/17913	5.43493e-11	6.32675e-09	5.61436e-09	CCL5/BCL2/IL7R/CCR7/CD6/PRKCQ/RASGRP1/CD27/CD3E/SIRPG/CD160/CD40LG/GRAP2/IFNG/CARD11/CD24/BTLA/CD70/TNFRSF13C	19
BP	GO:0002228	natural killer cell mediated immunity	11/194	63/17913	6.82026e-11	7.59421e-09	6.7391e-09	SH2D1A/SH2D1B/GZMB/CD96/KLRD1/RASGRP1/IL18RAP/CD160/CD226/SLAMF6/NCR3	11
BP	GO:0031341	regulation of cell killing	12/194	82/17913	7.90924e-11	8.43982e-09	7.4895e-09	SH2D1A/IL7R/PRF1/RASGRP1/IL18RAP/CD160/CD226/IFNG/SLAMF6/FCER2/STAP1/NCR3	12
BP	GO:0002521	leukocyte differentiation	25/194	485/17913	1.02676e-10	1.05182e-08	9.33382e-09	CD2/ITM2A/BCL2/CD3D/IL7R/LEF1/CCR7/BCL11B/RASGRP1/RORA/ZNF683/CD27/EOMES/IL18R1/CD3E/THEMIS/CD40LG/IFNG/CD79A/SLAMF6/CARD11/MS4A1/TPD52/CD19/RHOH	25
BP	GO:0001906	cell killing	15/194	156/17913	1.52076e-10	1.49795e-08	1.32928e-08	GNLY/SH2D1A/IL7R/PRF1/GZMB/RASGRP1/GZMM/IL18RAP/CD160/CD226/IFNG/SLAMF6/FCER2/STAP1/NCR3	15
BP	GO:0045785	positive regulation of cell adhesion	22/194	388/17913	2.46925e-10	2.33474e-08	2.07185e-08	ETS1/CCL5/SPOCK2/IL7R/CCR7/ADGRG1/CD6/SKAP1/PRKCQ/RASGRP1/CD27/CD3E/SIRPG/CD160/CD40LG/GRAP2/IFNG/CARD11/CD24/BTLA/CD70/TNFRSF13C	22
BP	GO:0002706	regulation of lymphocyte mediated immunity	14/194	136/17913	2.55262e-10	2.33474e-08	2.07185e-08	SH2D1A/SH2D1B/IL7R/LTA/CD96/RASGRP1/IL18R1/IL18RAP/CD160/CD226/SLAMF6/FCER2/CLC/NCR3	14
BP	GO:0002717	positive regulation of natural killer cell mediated immunity	8/194	28/17913	4.22874e-10	3.73442e-08	3.31392e-08	SH2D1A/SH2D1B/RASGRP1/IL18RAP/CD160/CD226/SLAMF6/NCR3	8
BP	GO:0002715	regulation of natural killer cell mediated immunity	9/194	42/17913	5.57448e-10	4.75875e-08	4.22291e-08	SH2D1A/SH2D1B/CD96/RASGRP1/IL18RAP/CD160/CD226/SLAMF6/NCR3	9
BP	GO:0001909	leukocyte mediated cytotoxicity	12/194	97/17913	5.9083e-10	4.88102e-08	4.33142e-08	SH2D1A/IL7R/PRF1/GZMB/RASGRP1/GZMM/IL18RAP/CD160/CD226/SLAMF6/STAP1/NCR3	12
BP	GO:0050854	regulation of antigen receptor-mediated signaling pathway	10/194	63/17913	1.36662e-09	1.09372e-07	9.70567e-08	PRKCH/CCR7/TRAT1/PVRIG/CD160/CD226/CD22/STAP1/CD19/BLK	10
BP	GO:0002708	positive regulation of lymphocyte mediated immunity	11/194	91/17913	4.02821e-09	3.12613e-07	2.77413e-07	SH2D1A/SH2D1B/LTA/RASGRP1/IL18R1/IL18RAP/CD160/CD226/SLAMF6/FCER2/NCR3	11
BP	GO:0045954	positive regulation of natural killer cell mediated cytotoxicity	7/194	24/17913	4.64389e-09	3.49794e-07	3.10407e-07	SH2D1A/RASGRP1/IL18RAP/CD160/CD226/SLAMF6/NCR3	7
BP	GO:0032649	regulation of interferon-gamma production	11/194	93/17913	5.09235e-09	3.72615e-07	3.30658e-07	CD2/CCR7/LTA/CD96/RASGRP1/IL18R1/CD3E/TXK/CD160/SLAMF6/TNFRSF13C	11
BP	GO:0031295	T cell costimulation	9/194	55/17913	7.04159e-09	5.00931e-07	4.44526e-07	CCR7/CD3E/CD160/CD40LG/GRAP2/CARD11/CD24/BTLA/TNFRSF13C	9
BP	GO:0031294	lymphocyte costimulation	9/194	56/17913	8.31213e-09	5.75334e-07	5.10551e-07	CCR7/CD3E/CD160/CD40LG/GRAP2/CARD11/CD24/BTLA/TNFRSF13C	9
BP	GO:0001912	positive regulation of leukocyte mediated cytotoxicity	8/194	40/17913	9.36283e-09	6.31005e-07	5.59954e-07	SH2D1A/RASGRP1/IL18RAP/CD160/CD226/SLAMF6/STAP1/NCR3	8
BP	GO:0046651	lymphocyte proliferation	16/194	244/17913	1.01682e-08	6.67711e-07	5.92527e-07	CCL5/BCL2/IL7R/CD6/PRKCQ/CD3E/CD40LG/CD79A/CARD11/MS4A1/CD24/CD22/CD19/CLC/CD70/TNFRSF13C	16
BP	GO:0032943	mononuclear cell proliferation	16/194	246/17913	1.14178e-08	7.31027e-07	6.48713e-07	CCL5/BCL2/IL7R/CD6/PRKCQ/CD3E/CD40LG/CD79A/CARD11/MS4A1/CD24/CD22/CD19/CLC/CD70/TNFRSF13C	16
BP	GO:0042113	B cell activation	15/194	215/17913	1.30226e-08	8.13439e-07	7.21846e-07	ITM2A/BCL2/IL7R/CD27/LAX1/CD40LG/CD79A/CARD11/BANK1/MS4A1/CD22/CXCR5/TPD52/CD19/TNFRSF13C	15
BP	GO:0002703	regulation of leukocyte mediated immunity	14/194	185/17913	1.44107e-08	8.78708e-07	7.79765e-07	SH2D1A/SH2D1B/IL7R/LTA/CD96/RASGRP1/IL18R1/IL18RAP/CD160/CD226/SLAMF6/FCER2/CLC/NCR3	14
BP	GO:0032729	positive regulation of interferon-gamma production	9/194	62/17913	2.10472e-08	1.25353e-06	1.11239e-06	CD2/LTA/RASGRP1/IL18R1/CD3E/TXK/CD160/SLAMF6/TNFRSF13C	9
BP	GO:0046631	alpha-beta T cell activation	12/194	133/17913	2.26487e-08	1.31826e-06	1.16982e-06	BCL2/LEF1/PRKCQ/BCL11B/RORA/ZNF683/EOMES/IL18R1/CD3E/CD160/IFNG/SLAMF6	12
BP	GO:0002460	adaptive immune response based on somatic recombination of immune receptors built from immunoglobulin superfamily domains	17/194	295/17913	2.36647e-08	1.34678e-06	1.19514e-06	IL7R/LEF1/PRF1/LTA/PRKCQ/GZMM/RORA/CD27/IL18R1/IL18RAP/CD226/CD40LG/SLAMF6/FCER2/CD19/CLC/TNFRSF13C	17
BP	GO:0045058	T cell selection	8/194	45/17913	2.5056e-08	1.39497e-06	1.23789e-06	BCL2/CD3D/CCR7/BCL11B/CD3E/THEMIS/SLAMF6/CARD11	8
BP	GO:0001910	regulation of leukocyte mediated cytotoxicity	9/194	64/17913	2.80456e-08	1.52819e-06	1.35611e-06	SH2D1A/IL7R/RASGRP1/IL18RAP/CD160/CD226/SLAMF6/STAP1/NCR3	9
BP	GO:0070661	leukocyte proliferation	16/194	270/17913	4.22355e-08	2.25344e-06	1.9997e-06	CCL5/BCL2/IL7R/CD6/PRKCQ/CD3E/CD40LG/CD79A/CARD11/MS4A1/CD24/CD22/CD19/CLC/CD70/TNFRSF13C	16
BP	GO:0002705	positive regulation of leukocyte mediated immunity	11/194	117/17913	5.78413e-08	3.0231e-06	2.6827e-06	SH2D1A/SH2D1B/LTA/RASGRP1/IL18R1/IL18RAP/CD160/CD226/SLAMF6/FCER2/NCR3	11
BP	GO:0042100	B cell proliferation	9/194	71/17913	7.10514e-08	3.6205e-06	3.21283e-06	BCL2/IL7R/CD40LG/CD79A/CARD11/MS4A1/CD22/CD19/TNFRSF13C	9
BP	GO:0002697	regulation of immune effector process	20/194	441/17913	7.2099e-08	3.6205e-06	3.21283e-06	SH2D1A/SH2D1B/IL7R/LTA/CD96/RASGRP1/ZNF683/IL18R1/IL18RAP/CD160/CD226/CD40LG/IFNG/SLAMF6/FCER2/CD22/CD19/CLC/IFNLR1/NCR3	20
BP	GO:0050853	B cell receptor signaling pathway	8/194	53/17913	9.56777e-08	4.71213e-06	4.18154e-06	PRKCH/BCL2/CD79A/MS4A1/CD22/STAP1/CD19/BLK	8
BP	GO:0042269	regulation of natural killer cell mediated cytotoxicity	7/194	39/17913	1.79887e-07	8.69228e-06	7.71353e-06	SH2D1A/RASGRP1/IL18RAP/CD160/CD226/SLAMF6/NCR3	7
BP	GO:0042267	natural killer cell mediated cytotoxicity	8/194	59/17913	2.26457e-07	1.07399e-05	9.53062e-06	SH2D1A/GZMB/RASGRP1/IL18RAP/CD160/CD226/SLAMF6/NCR3	8
BP	GO:0042102	positive regulation of T cell proliferation	9/194	90/17913	5.64555e-07	2.62878e-05	2.33278e-05	CCL5/CD6/PRKCQ/CD3E/CD40LG/CARD11/CD24/CD70/TNFRSF13C	9
BP	GO:0033077	T cell differentiation in thymus	8/194	69/17913	7.78543e-07	3.56044e-05	3.15954e-05	BCL2/CD3D/IL7R/CCR7/BCL11B/RASGRP1/CD3E/CARD11	8
BP	GO:0050671	positive regulation of lymphocyte proliferation	10/194	125/17913	1.06146e-06	4.76914e-05	4.23213e-05	CCL5/BCL2/CD6/PRKCQ/CD3E/CD40LG/CARD11/CD24/CD70/TNFRSF13C	10
BP	GO:0032946	positive regulation of mononuclear cell proliferation	10/194	126/17913	1.14224e-06	5.04358e-05	4.47567e-05	CCL5/BCL2/CD6/PRKCQ/CD3E/CD40LG/CARD11/CD24/CD70/TNFRSF13C	10
BP	GO:0046632	alpha-beta T cell differentiation	9/194	99/17913	1.2726e-06	5.52394e-05	4.90194e-05	BCL2/LEF1/BCL11B/RORA/ZNF683/EOMES/IL18R1/IFNG/SLAMF6	9
BP	GO:0006968	cellular defense response	7/194	53/17913	1.58615e-06	6.77024e-05	6.00791e-05	GNLY/KLRG1/SH2D1A/PRF1/ITK/TRAT1/FCMR	7
BP	GO:0002699	positive regulation of immune effector process	12/194	198/17913	1.72756e-06	7.25294e-05	6.43626e-05	SH2D1A/SH2D1B/LTA/RASGRP1/IL18R1/IL18RAP/CD160/CD226/IFNG/SLAMF6/FCER2/NCR3	12
BP	GO:0050670	regulation of lymphocyte proliferation	12/194	199/17913	1.82121e-06	7.52277e-05	6.67571e-05	CCL5/BCL2/CD6/PRKCQ/CD3E/CD40LG/CARD11/CD24/CD22/CLC/CD70/TNFRSF13C	12
BP	GO:0032944	regulation of mononuclear cell proliferation	12/194	200/17913	1.91932e-06	7.80218e-05	6.92365e-05	CCL5/BCL2/CD6/PRKCQ/CD3E/CD40LG/CARD11/CD24/CD22/CLC/CD70/TNFRSF13C	12
BP	GO:0070665	positive regulation of leukocyte proliferation	10/194	134/17913	2.00614e-06	8.02768e-05	7.12377e-05	CCL5/BCL2/CD6/PRKCQ/CD3E/CD40LG/CARD11/CD24/CD70/TNFRSF13C	10
BP	GO:0030183	B cell differentiation	9/194	113/17913	3.85339e-06	0.000150373	0.000133441	ITM2A/BCL2/CD27/CD40LG/CD79A/CARD11/MS4A1/TPD52/CD19	9
BP	GO:0070663	regulation of leukocyte proliferation	12/194	214/17913	3.87529e-06	0.000150373	0.000133441	CCL5/BCL2/CD6/PRKCQ/CD3E/CD40LG/CARD11/CD24/CD22/CLC/CD70/TNFRSF13C	12
BP	GO:0050857	positive regulation of antigen receptor-mediated signaling pathway	5/194	23/17913	4.06337e-06	0.000155318	0.000137829	PRKCH/CCR7/TRAT1/CD226/STAP1	5
BP	GO:0042129	regulation of T cell proliferation	10/194	149/17913	5.22022e-06	0.000196603	0.000174465	CCL5/CD6/PRKCQ/CD3E/CD40LG/CARD11/CD24/CLC/CD70/TNFRSF13C	10
BP	GO:0002819	regulation of adaptive immune response	10/194	150/17913	5.54109e-06	0.000205663	0.000182505	IL7R/LTA/SKAP1/PRKCQ/IL18R1/CD160/CD226/FCER2/CLC/TNFRSF13C	10
BP	GO:0001819	positive regulation of cytokine production	17/194	446/17913	7.52581e-06	0.000275337	0.000244334	LTB/CD2/CCR7/LTA/CD6/PRKCQ/RASGRP1/RORA/IL18R1/CD3E/TXK/CD160/CD40LG/IFNG/SLAMF6/CARD11/TNFRSF13C	17
BP	GO:0002440	production of molecular mediator of immune response	11/194	191/17913	7.67522e-06	0.000276848	0.000245675	ITM2A/IL7R/CD96/LAX1/IL18R1/IL18RAP/CD160/CD40LG/CARD11/CD22/CLC	11
BP	GO:0002285	lymphocyte activation involved in immune response	10/194	158/17913	8.78403e-06	0.000312443	0.000277262	ITM2A/LEF1/RORA/ZNF683/EOMES/IL18R1/CD40LG/IFNG/SLAMF6/CD19	10
BP	GO:0050855	regulation of B cell receptor signaling pathway	5/194	28/17913	1.13574e-05	0.000398442	0.000353577	PRKCH/CD22/STAP1/CD19/BLK	5
BP	GO:0032633	interleukin-4 production	5/194	32/17913	2.24675e-05	0.00076719	0.000680804	LEF1/ITK/PRKCQ/CD3E/CD40LG	5
BP	GO:0043368	positive T cell selection	5/194	32/17913	2.24675e-05	0.00076719	0.000680804	BCL2/CD3D/BCL11B/THEMIS/SLAMF6	5
BP	GO:0042098	T cell proliferation	10/194	177/17913	2.36407e-05	0.000796631	0.00070693	CCL5/CD6/PRKCQ/CD3E/CD40LG/CARD11/CD24/CLC/CD70/TNFRSF13C	10
BP	GO:0048535	lymph node development	4/194	17/17913	2.84257e-05	0.00093331	0.000828219	LTB/IL7R/LTA/CXCR5	4
BP	GO:0070233	negative regulation of T cell apoptotic process	4/194	17/17913	2.84257e-05	0.00093331	0.000828219	CCL5/IL7R/PRKCQ/CD27	4
BP	GO:0071356	cellular response to tumor necrosis factor	12/194	266/17913	3.44146e-05	0.00111564	0.000990023	LTB/CCL5/LTA/RORA/CD27/TNFRSF25/CD40LG/TCL1A/CD70/TNFRSF13B/TNFRSF13C/TNFRSF17	12
BP	GO:0045061	thymic T cell selection	4/194	19/17913	4.55141e-05	0.00145702	0.00129296	CD3D/CCR7/CD3E/CARD11	4
BP	GO:0002287	alpha-beta T cell activation involved in immune response	6/194	61/17913	5.05467e-05	0.00157866	0.0014009	LEF1/RORA/EOMES/IL18R1/IFNG/SLAMF6	6
BP	GO:0002293	alpha-beta T cell differentiation involved in immune response	6/194	61/17913	5.05467e-05	0.00157866	0.0014009	LEF1/RORA/EOMES/IL18R1/IFNG/SLAMF6	6
BP	GO:0050856	regulation of T cell receptor signaling pathway	5/194	38/17913	5.31284e-05	0.0016393	0.00145471	CCR7/TRAT1/PVRIG/CD160/CD226	5
BP	GO:0035710	CD4-positive, alpha-beta T cell activation	7/194	90/17913	5.48672e-05	0.0016728	0.00148444	LEF1/PRKCQ/RORA/IL18R1/CD160/IFNG/SLAMF6	7
BP	GO:0034612	response to tumor necrosis factor	12/194	284/17913	6.48059e-05	0.00195257	0.00173271	LTB/CCL5/LTA/RORA/CD27/TNFRSF25/CD40LG/TCL1A/CD70/TNFRSF13B/TNFRSF13C/TNFRSF17	12
BP	GO:0048872	homeostasis of number of cells	11/194	241/17913	6.59756e-05	0.00196469	0.00174347	ETS1/BCL2/IL7R/CCR7/LAT/TGFBR3/CCR4/CARD11/JAM3/TNFRSF13C/TNFRSF17	11
BP	GO:0019835	cytolysis	5/194	40/17913	6.84363e-05	0.00201454	0.00178771	GZMA/PRF1/GZMH/GZMB/GZMM	5
BP	GO:0002821	positive regulation of adaptive immune response	7/194	94/17913	7.2483e-05	0.00210942	0.0018719	LTA/SKAP1/PRKCQ/IL18R1/CD226/FCER2/TNFRSF13C	7
BP	GO:0002292	T cell differentiation involved in immune response	6/194	66/17913	7.90876e-05	0.00227577	0.00201952	LEF1/RORA/EOMES/IL18R1/IFNG/SLAMF6	6
BP	GO:0008037	cell recognition	8/194	129/17913	8.16567e-05	0.00232359	0.00206195	PRF1/CCR7/CD6/CD226/CD5/LAMA5/CNTNAP2/NCR3	8
BP	GO:0070227	lymphocyte apoptotic process	6/194	67/17913	8.60921e-05	0.00242288	0.00215006	CCL5/IL7R/PRKCQ/CD3G/CD27/CLC	6
BP	GO:0033209	tumor necrosis factor-mediated signaling pathway	9/194	167/17913	8.74514e-05	0.00243438	0.00216027	LTB/LTA/CD27/TNFRSF25/CD40LG/CD70/TNFRSF13B/TNFRSF13C/TNFRSF17	9
BP	GO:0045088	regulation of innate immune response	15/194	440/17913	9.32335e-05	0.00256743	0.00227834	CCL5/SH2D1A/PYHIN1/SH2D1B/CD96/RASGRP1/IL18RAP/TXK/CD160/CD226/IFNG/SLAMF6/TLR10/CARD11/NCR3	15
BP	GO:0002822	regulation of adaptive immune response based on somatic recombination of immune receptors built from immunoglobulin superfamily domains	8/194	135/17913	0.000112296	0.00305947	0.00271498	IL7R/LTA/PRKCQ/IL18R1/CD226/FCER2/CLC/TNFRSF13C	8
BP	GO:0071887	leukocyte apoptotic process	7/194	103/17913	0.000129286	0.00348527	0.00309283	CCL5/IL7R/CCR7/PRKCQ/CD3G/CD27/CLC	7
BP	GO:0070231	T cell apoptotic process	5/194	46/17913	0.000135264	0.00357125	0.00316913	CCL5/IL7R/PRKCQ/CD27/CLC	5
BP	GO:2000107	negative regulation of leukocyte apoptotic process	5/194	46/17913	0.000135264	0.00357125	0.00316913	CCL5/IL7R/CCR7/PRKCQ/CD27	5
BP	GO:0032461	positive regulation of protein oligomerization	4/194	25/17913	0.000141178	0.00368934	0.00327392	TRABD2A/JCHAIN/TCL1A/HRK	4
BP	GO:0032673	regulation of interleukin-4 production	4/194	27/17913	0.000192575	0.00489241	0.00434152	LEF1/PRKCQ/CD3E/CD40LG	4
BP	GO:0033632	regulation of cell-cell adhesion mediated by integrin	3/194	11/17913	0.00019358	0.00489241	0.00434152	CCL5/SKAP1/CD3E	3
BP	GO:0043383	negative T cell selection	3/194	11/17913	0.00019358	0.00489241	0.00434152	CCR7/CD3E/THEMIS	3
BP	GO:0050864	regulation of B cell activation	7/194	110/17913	0.000194856	0.00489241	0.00434152	BCL2/CD27/CARD11/BANK1/CD22/CD19/TNFRSF13C	7
BP	GO:0070228	regulation of lymphocyte apoptotic process	5/194	51/17913	0.000221878	0.00543365	0.00482183	CCL5/IL7R/PRKCQ/CD3G/CD27	5
BP	GO:0045089	positive regulation of innate immune response	13/194	373/17913	0.000221903	0.00543365	0.00482183	CCL5/SH2D1A/PYHIN1/SH2D1B/RASGRP1/IL18RAP/TXK/CD160/CD226/SLAMF6/TLR10/CARD11/NCR3	13
BP	GO:0070229	negative regulation of lymphocyte apoptotic process	4/194	28/17913	0.000222778	0.00543365	0.00482183	CCL5/IL7R/PRKCQ/CD27	4
BP	GO:0051712	positive regulation of killing of cells of other organism	3/194	12/17913	0.00025605	0.00615546	0.00546235	PRF1/IFNG/FCER2	3
BP	GO:0002791	regulation of peptide secretion	15/194	483/17913	0.000257178	0.00615546	0.00546235	CCL5/CD2/CCR7/PASK/RASGRP1/CD160/CD40LG/IFNG/ADTRP/TLR10/BANK1/SLC2A1/CD22/ILDR1/BLK	15
BP	GO:2000106	regulation of leukocyte apoptotic process	6/194	82/17913	0.000264149	0.0062581	0.00555344	CCL5/IL7R/CCR7/PRKCQ/CD3G/CD27	6
BP	GO:0032655	regulation of interleukin-12 production	5/194	53/17913	0.000266354	0.0062581	0.00555344	LTB/CCR7/SLAMF1/CD40LG/IFNG	5
BP	GO:0032615	interleukin-12 production	5/194	55/17913	0.000317291	0.00738712	0.00655533	LTB/CCR7/SLAMF1/CD40LG/IFNG	5
BP	GO:0045086	positive regulation of interleukin-2 biosynthetic process	3/194	13/17913	0.000330215	0.00755071	0.0067005	PRKCQ/CD3E/CARD11	3
BP	GO:1902713	regulation of interferon-gamma secretion	3/194	13/17913	0.000330215	0.00755071	0.0067005	CD2/RASGRP1/CD160	3
BP	GO:0070232	regulation of T cell apoptotic process	4/194	32/17913	0.000378252	0.0085726	0.00760733	CCL5/IL7R/PRKCQ/CD27	4
BP	GO:0002286	T cell activation involved in immune response	6/194	88/17913	0.000387487	0.00862916	0.00765752	LEF1/RORA/EOMES/IL18R1/IFNG/SLAMF6	6
BP	GO:0002456	T cell mediated immunity	6/194	88/17913	0.000387487	0.00862916	0.00765752	IL7R/PRF1/GZMM/IL18R1/IL18RAP/CLC	6
BP	GO:0051260	protein homooligomerization	12/194	345/17913	0.000394019	0.008699	0.00771949	CD247/CD3D/PRF1/CD3G/CD3E/CD79B/CD79A/TCL1A/ILDR1/KCNG1/ALDH5A1/HRK	12
BP	GO:0002824	positive regulation of adaptive immune response based on somatic recombination of immune receptors built from immunoglobulin superfamily domains	6/194	89/17913	0.000411807	0.00897272	0.00796239	LTA/PRKCQ/IL18R1/CD226/FCER2/TNFRSF13C	6
BP	GO:0001771	immunological synapse formation	3/194	14/17913	0.000416928	0.00897272	0.00796239	PRF1/CCR7/CD6	3
BP	GO:0050862	positive regulation of T cell receptor signaling pathway	3/194	14/17913	0.000416928	0.00897272	0.00796239	CCR7/TRAT1/CD226	3
BP	GO:0002294	CD4-positive, alpha-beta T cell differentiation involved in immune response	5/194	60/17913	0.000476852	0.0101518	0.00900873	LEF1/RORA/IL18R1/IFNG/SLAMF6	5
BP	GO:0032735	positive regulation of interleukin-12 production	4/194	34/17913	0.000479645	0.0101518	0.00900873	LTB/CCR7/CD40LG/IFNG	4
BP	GO:0051709	regulation of killing of cells of other organism	3/194	15/17913	0.000517015	0.0108531	0.00963102	PRF1/IFNG/FCER2	3
BP	GO:0030101	natural killer cell activation	5/194	63/17913	0.000597844	0.0123474	0.0109571	CD2/RASGRP1/ZNF683/IL18R1/NCR3	5
BP	GO:0042108	positive regulation of cytokine biosynthetic process	5/194	63/17913	0.000597844	0.0123474	0.0109571	LTB/PRKCQ/CD3E/CARD11/TNFRSF13C	5
BP	GO:0033631	cell-cell adhesion mediated by integrin	3/194	16/17913	0.000631267	0.0129334	0.0114771	CCL5/SKAP1/CD3E	3
BP	GO:0002377	immunoglobulin production	6/194	98/17913	0.00068843	0.0139926	0.012417	ITM2A/IL7R/LAX1/CD40LG/CARD11/CD22	6
BP	GO:0002418	immune response to tumor cell	3/194	17/17913	0.000760447	0.0153347	0.013608	PRF1/CD160/CD226	3
BP	GO:0045580	regulation of T cell differentiation	7/194	139/17913	0.000803389	0.0160741	0.0142641	CD2/IL7R/RASGRP1/ZNF683/CD27/IFNG/CARD11	7
BP	GO:0006959	humoral immune response	10/194	276/17913	0.000878912	0.0174488	0.0154841	GNLY/BCL2/SH2D1A/CCR7/LTA/FCER2/JCHAIN/MS4A1/CD19/POU2AF1	10
BP	GO:0002922	positive regulation of humoral immune response	3/194	19/17913	0.0010665	0.0208496	0.0185019	CCR7/LTA/FCER2	3
BP	GO:0045076	regulation of interleukin-2 biosynthetic process	3/194	19/17913	0.0010665	0.0208496	0.0185019	PRKCQ/CD3E/CARD11	3
BP	GO:0051092	positive regulation of NF-kappaB transcription factor activity	7/194	149/17913	0.00120624	0.023403	0.0207678	PRKCH/PRKCQ/IL18R1/IL18RAP/CD40LG/CARD11/TRAF5	7
BP	GO:0033630	positive regulation of cell adhesion mediated by integrin	3/194	20/17913	0.00124475	0.0237937	0.0211145	CCL5/SKAP1/CD3E	3
BP	GO:0043367	CD4-positive, alpha-beta T cell differentiation	5/194	74/17913	0.00124497	0.0237937	0.0211145	LEF1/RORA/IL18R1/IFNG/SLAMF6	5
BP	GO:0042035	regulation of cytokine biosynthetic process	6/194	110/17913	0.00125893	0.0238824	0.0211932	LTB/PRKCQ/CD3E/CARD11/TRIB2/TNFRSF13C	6
BP	GO:0002437	inflammatory response to antigenic stimulus	4/194	44/17913	0.00129052	0.0241243	0.0214079	CCR7/LTA/CD6/RASGRP1	4
BP	GO:0032459	regulation of protein oligomerization	4/194	44/17913	0.00129052	0.0241243	0.0214079	TRABD2A/JCHAIN/TCL1A/HRK	4
BP	GO:0050708	regulation of protein secretion	13/194	456/17913	0.00144214	0.0267632	0.0237497	CCL5/CD2/CCR7/RASGRP1/CD160/CD40LG/IFNG/ADTRP/TLR10/BANK1/SLC2A1/CD22/BLK	13
BP	GO:0042094	interleukin-2 biosynthetic process	3/194	22/17913	0.00165494	0.0300589	0.0266743	PRKCQ/CD3E/CARD11	3
BP	GO:0048305	immunoglobulin secretion	3/194	22/17913	0.00165494	0.0300589	0.0266743	LAX1/CD40LG/CD22	3
BP	GO:0072643	interferon-gamma secretion	3/194	22/17913	0.00165494	0.0300589	0.0266743	CD2/RASGRP1/CD160	3
BP	GO:0050900	leukocyte migration	13/194	467/17913	0.00178072	0.0321157	0.0284995	CCL5/CD2/S1PR1/CCR7/PLCG1/SIRPG/ADTRP/IGLL1/JCHAIN/CXCR5/STAP1/VPREB3/JAM3	13
BP	GO:0002347	response to tumor cell	3/194	23/17913	0.00188811	0.0335795	0.0297984	PRF1/CD160/CD226	3
BP	GO:0032753	positive regulation of interleukin-4 production	3/194	23/17913	0.00188811	0.0335795	0.0297984	PRKCQ/CD3E/CD40LG	3
BP	GO:0042089	cytokine biosynthetic process	6/194	120/17913	0.00196455	0.034698	0.030791	LTB/PRKCQ/CD3E/CARD11/TRIB2/TNFRSF13C	6
BP	GO:0042107	cytokine metabolic process	6/194	121/17913	0.00204879	0.035938	0.0318914	LTB/PRKCQ/CD3E/CARD11/TRIB2/TNFRSF13C	6
BP	GO:0045619	regulation of lymphocyte differentiation	7/194	164/17913	0.00208956	0.0364038	0.0323047	CD2/IL7R/RASGRP1/ZNF683/CD27/IFNG/CARD11	7
BP	GO:0001776	leukocyte homeostasis	5/194	84/17913	0.00218742	0.0378512	0.0335892	BCL2/LAT/JAM3/TNFRSF13C/TNFRSF17	5
BP	GO:0070098	chemokine-mediated signaling pathway	4/194	51/17913	0.00223997	0.0385004	0.0341652	CCL5/CCR7/CCR4/CXCR5	4
BP	GO:0007160	cell-matrix adhesion	8/194	214/17913	0.00235249	0.0401649	0.0356423	BCL2/CCR7/CD96/SKAP1/CD3E/LAMA5/JAM3/PTPRK	8
BP	GO:2000353	positive regulation of endothelial cell apoptotic process	3/194	25/17913	0.00241342	0.0409323	0.0363233	PLCG1/CD160/CD40LG	3
BP	GO:0042476	odontogenesis	6/194	126/17913	0.00251164	0.0423178	0.0375528	LEF1/BCL11B/AXIN2/ID3/LAMA5/ALPL	6
BP	GO:0002507	tolerance induction	3/194	26/17913	0.00270664	0.0453052	0.0402039	CD3E/CCR4/CLC	3
BP	GO:0046634	regulation of alpha-beta T cell activation	5/194	90/17913	0.00295616	0.0491606	0.0436251	PRKCQ/ZNF683/CD3E/CD160/IFNG	5
BP	GO:0050858	negative regulation of antigen receptor-mediated signaling pathway	3/194	27/17913	0.0030209	0.049913	0.0442928	PVRIG/CD160/CD22	3
CC	GO:0042101	T cell receptor complex	8/198	17/18678	3.10027e-12	7.84369e-10	7.57119e-10	CD247/CD3D/CD8A/CD6/SKAP1/TRAT1/CD3G/CD3E	8
CC	GO:0001772	immunological synapse	9/198	36/18678	1.03576e-10	1.31023e-08	1.26471e-08	GZMA/LAT/CD6/GZMB/SKAP1/PRKCQ/CD3E/CARD11/RHOH	9
CC	GO:0009897	external side of plasma membrane	16/198	199/18678	3.94375e-10	3.32589e-08	3.21035e-08	CD2/S1PR1/IL7R/CD8A/IL2RB/TGFBR3/KLRD1/CD3E/CD40LG/CD5/CD79A/FCER2/CD69/MS4A1/CD19/TNFRSF13C	16
CC	GO:0098802	plasma membrane receptor complex	14/198	153/18678	9.40261e-10	5.94715e-08	5.74054e-08	CD247/CD3D/CD8A/IL2RB/CD6/SKAP1/TRAT1/CD3G/IL18R1/IL18RAP/CD3E/CD79A/TRAF5/IFNLR1	14
CC	GO:0098552	side of membrane	18/198	359/18678	5.57284e-08	2.81986e-06	2.72189e-06	CD2/PTPN4/S1PR1/IL7R/CD8A/IL2RB/TGFBR3/KLRD1/CD3E/CD40LG/CD5/CD79A/FCER2/CD69/MS4A1/TRAF5/CD19/TNFRSF13C	18
CC	GO:0043235	receptor complex	16/198	292/18678	9.41868e-08	3.97154e-06	3.83357e-06	CD247/CD3D/CD8A/IL2RB/TGFBR3/CD6/SKAP1/KLRD1/TRAT1/CD3G/IL18R1/IL18RAP/CD3E/CD79A/TRAF5/IFNLR1	16
CC	GO:0098797	plasma membrane protein complex	19/198	451/18678	3.53572e-07	1.27791e-05	1.23351e-05	CD247/CD3D/CD8A/IL2RB/TGFBR3/CD6/SKAP1/TRAT1/CD3G/IL18R1/IL18RAP/CD3E/CD79A/HLA-DOB/TRAF5/KCNG1/IFNLR1/CNTNAP2/SSPN	19
CC	GO:0045121	membrane raft	15/198	309/18678	1.11796e-06	3.27207e-05	3.1584e-05	CD2/MAL/S1PR1/CD8A/ADGRG1/LAT/SKAP1/CD226/ADTRP/CD79A/CARD11/SLC2A1/MS4A1/CD24/CD19	15
CC	GO:0098857	membrane microdomain	15/198	310/18678	1.16398e-06	3.27207e-05	3.1584e-05	CD2/MAL/S1PR1/CD8A/ADGRG1/LAT/SKAP1/CD226/ADTRP/CD79A/CARD11/SLC2A1/MS4A1/CD24/CD19	15
CC	GO:0098589	membrane region	15/198	321/18678	1.79509e-06	4.54157e-05	4.3838e-05	CD2/MAL/S1PR1/CD8A/ADGRG1/LAT/SKAP1/CD226/ADTRP/CD79A/CARD11/SLC2A1/MS4A1/CD24/CD19	15
CC	GO:0005911	cell-cell junction	13/198	414/18678	0.000492573	0.0113292	0.0109356	CD2/ITK/LAT/SKAP1/PLCG1/CD3E/THEMIS/PDLIM1/SLC2A1/ILDR1/JAM3/PTPRK/CNTNAP2	13
CC	GO:0044853	plasma membrane raft	6/198	106/18678	0.00093218	0.0196535	0.0189707	MAL/CD8A/SKAP1/ADTRP/SLC2A1/MS4A1	6
CC	GO:0071682	endocytic vesicle lumen	3/198	20/18678	0.00117099	0.0227892	0.0219975	HBB/HBA2/GNLY	3
MF	GO:0005070	SH3/SH2 adaptor activity	7/189	52/16969	1.66659e-06	0.000269825	0.000235681	SH2D1A/LAT/SKAP1/SOCS2/GRAP2/FCRL2/STAP1	7
MF	GO:0004896	cytokine receptor activity	8/189	78/16969	2.46041e-06	0.000269825	0.000235681	IL7R/CCR7/IL2RB/IL18R1/IL18RAP/CCR4/CXCR5/IFNLR1	8
MF	GO:0035591	signaling adaptor activity	8/189	78/16969	2.46041e-06	0.000269825	0.000235681	SH2D1A/LAT/SKAP1/TRAT1/SOCS2/GRAP2/FCRL2/STAP1	8
MF	GO:0023023	MHC protein complex binding	5/189	25/16969	7.207e-06	0.000592776	0.000517766	CD8A/KLRD1/CD160/MS4A1/HLA-DOB	5
MF	GO:0030674	protein binding, bridging	10/189	156/16969	9.94812e-06	0.000654586	0.000571755	SH2D1A/SH2D1B/LAT/SKAP1/TRAT1/SOCS2/GRAP2/JCHAIN/FCRL2/STAP1	10
MF	GO:0019865	immunoglobulin binding	4/189	23/16969	0.000111841	0.00588301	0.00513858	FCER2/JCHAIN/MS4A1/CD22	4
MF	GO:0005126	cytokine receptor binding	10/189	210/16969	0.00012517	0.00588301	0.00513858	LTB/CCL5/LTA/TGFBR3/PLCG1/SOCS2/CD40LG/IFNG/STAP1/CD70	10
MF	GO:0060090	molecular adaptor activity	10/189	216/16969	0.000157615	0.00648192	0.0056617	SH2D1A/SH2D1B/LAT/SKAP1/TRAT1/SOCS2/GRAP2/JCHAIN/FCRL2/STAP1	10
MF	GO:1990782	protein tyrosine kinase binding	6/189	80/16969	0.000267524	0.00977949	0.008542	CD2/CD247/PLCG1/TRAT1/BANK1/STAP1	6
MF	GO:0005164	tumor necrosis factor receptor binding	4/189	30/16969	0.000325684	0.010715	0.00935912	LTB/LTA/CD40LG/CD70	4
MF	GO:0032813	tumor necrosis factor receptor superfamily binding	4/189	45/16969	0.00155483	0.0465036	0.040619	LTB/LTA/CD40LG/CD70	4
KEGG	hsa04640	Hematopoietic cell lineage	14/108	99/8016	4.05e-11	3.79e-09	3.17e-09	CD2/CD3D/IL7R/CD7/CD8A/CD3G/CD3E/CD5/FCER2/MS4A1/CD24/HLA-DOB/CD22/CD19	14
KEGG	hsa05340	Primary immunodeficiency	10/108	38/8016	4.46e-11	3.79e-09	3.17e-09	CD3D/IL7R/CD8A/CD3E/CD40LG/CD79A/IGLL1/CD19/TNFRSF13B/TNFRSF13C	10
KEGG	hsa04660	T cell receptor signaling pathway	14/108	104/8016	8.01e-11	4.54e-09	3.79e-09	CD247/CD3D/CD8A/ITK/LAT/PLCG1/PRKCQ/RASGRP1/CD3G/CD3E/CD40LG/GRAP2/IFNG/CARD11	14
KEGG	hsa04060	Cytokine-cytokine receptor interaction	20/108	294/8016	1.62e-09	6.87e-08	5.74e-08	LTB/CCL5/IL7R/IL32/CCR7/IL2RB/LTA/CD27/IL18R1/IL18RAP/TNFRSF25/CD40LG/CCR4/IFNG/CXCR5/CD70/TNFRSF13B/IFNLR1/TNFRSF13C/TNFRSF17	20
KEGG	hsa04658	Th1 and Th2 cell differentiation	11/108	92/8016	3.43e-08	1.17e-06	9.75e-07	CD247/CD3D/STAT4/IL2RB/LAT/PLCG1/PRKCQ/CD3G/CD3E/IFNG/HLA-DOB	11
KEGG	hsa04659	Th17 cell differentiation	11/108	107/8016	1.67e-07	4.74e-06	3.96e-06	CD247/CD3D/IL2RB/LAT/PLCG1/PRKCQ/CD3G/RORA/CD3E/IFNG/HLA-DOB	11
KEGG	hsa04064	NF-kappa B signaling pathway	10/108	102/8016	9.81e-07	2.38e-05	1.99e-05	LTB/BCL2/LAT/LTA/PLCG1/PRKCQ/CD40LG/CARD11/TRAF5/TNFRSF13C	10
KEGG	hsa05235	PD-L1 expression and PD-1 checkpoint pathway in cancer	9/108	89/8016	2.71e-06	5.76e-05	4.81e-05	CD247/CD3D/LAT/PLCG1/PRKCQ/RASGRP1/CD3G/CD3E/IFNG	9
KEGG	hsa04650	Natural killer cell mediated cytotoxicity	10/108	131/8016	9.6e-06	0.000181264	0.000151521	CD247/SH2D1A/SH2D1B/PRF1/LAT/GZMB/KLRD1/PLCG1/IFNG/NCR3	10
KEGG	hsa04061	Viral protein interaction with cytokine and cytokine receptor	8/108	100/8016	5.58e-05	0.000948224	0.000792633	CCL5/CCR7/IL2RB/LTA/IL18R1/IL18RAP/CCR4/CXCR5	8
KEGG	hsa04662	B cell receptor signaling pathway	7/108	82/8016	0.000109854	0.00169774	0.00141916	CD79B/CD79A/CARD11/CD22/CD19/CD72/RASGRP3	7
KEGG	hsa05330	Allograft rejection	5/108	38/8016	0.000142522	0.00200656	0.00167731	PRF1/GZMB/CD40LG/IFNG/HLA-DOB	5
KEGG	hsa04514	Cell adhesion molecules (CAMs)	9/108	147/8016	0.000153443	0.00200656	0.00167731	CD2/CD8A/CD6/CD226/CD40LG/HLA-DOB/CD22/JAM3/CNTNAP2	9
KEGG	hsa05332	Graft-versus-host disease	5/108	41/8016	0.000206068	0.00250226	0.00209167	PRF1/GZMB/KLRD1/IFNG/HLA-DOB	5
KEGG	hsa05321	Inflammatory bowel disease (IBD)	6/108	65/8016	0.000225467	0.0025553	0.00213601	STAT4/RORA/IL18R1/IL18RAP/IFNG/HLA-DOB	6
KEGG	hsa04940	Type I diabetes mellitus	5/108	43/8016	0.000259096	0.0027529	0.00230118	PRF1/LTA/GZMB/IFNG/HLA-DOB	5
KEGG	hsa05169	Epstein-Barr virus infection	10/108	201/8016	0.000358968	0.00358968	0.00300067	CCND2/CD247/BCL2/CD3D/CD3G/CD3E/FCER2/HLA-DOB/TRAF5/CD19	10
KEGG	hsa04672	Intestinal immune network for IgA production	5/108	49/8016	0.000481417	0.00454671	0.00380066	CD40LG/HLA-DOB/TNFRSF13B/TNFRSF13C/TNFRSF17	5
KEGG	hsa05144	Malaria	5/108	50/8016	0.000529232	0.00473523	0.00395825	HBB/HBA2/KLRB1/CD40LG/IFNG	5
KEGG	hsa05166	Human T-cell leukemia virus 1 infection	10/108	219/8016	0.0007052	0.0059942	0.00501063	ETS1/CCND2/CD3D/IL2RB/LTA/CD3G/CD3E/SLC2A1/HLA-DOB/TNFRSF13C	10
KEGG	hsa04630	JAK-STAT signaling pathway	8/108	162/8016	0.00148724	0.0120396	0.010064	CCND2/BCL2/IL7R/STAT4/IL2RB/SOCS2/IFNG/IFNLR1	8
KEGG	hsa05170	Human immunodeficiency virus 1 infection	9/108	212/8016	0.00216881	0.016759	0.014009	CD247/BCL2/CD3D/PLCG1/CD3G/CD3E/GNG7/TRAF5/WEE1	9
KEGG	hsa05142	Chagas disease (American trypanosomiasis)	6/108	102/8016	0.00246011	0.0179182	0.0149781	CCL5/CD247/CD3D/CD3G/CD3E/IFNG	6
KEGG	hsa05162	Measles	7/108	138/8016	0.00252963	0.0179182	0.0149781	CCND2/BCL2/CD3D/IL2RB/CD3G/CD3E/SLAMF1	7
KEGG	hsa05320	Autoimmune thyroid disease	4/108	53/8016	0.00549736	0.037382	0.0312481	PRF1/GZMB/CD40LG/HLA-DOB	4
DO	DOID:1040	chronic lymphocytic leukemia	18/137	221/8007	3.31881e-08	1.7125e-05	1.53364e-05	CD2/BCL2/LEF1/CD160/CD40LG/CD5/IFNG/FCMR/FCER2/FCRL2/MS4A1/TCL1A/CXCR5/RHOH/LAMA5/POU2AF1/TNFRSF13C/NT5E	18
DO	DOID:1037	lymphoblastic leukemia	25/137	443/8007	9.7013e-08	2.50293e-05	2.24151e-05	CCND2/CD2/BCL2/LEF1/PRF1/IL2RB/CD160/CD40LG/CCR4/CD5/IFNG/FCMR/FCER2/FCRL2/MS4A1/CD24/TCL1A/CXCR5/CD70/BACH2/RHOH/LAMA5/POU2AF1/TNFRSF13C/NT5E	25
DO	DOID:526	Human immunodeficiency virus infectious disease	15/137	173/8007	2.23203e-07	3.83908e-05	3.4381e-05	CCL5/GNLY/BCL2/IL7R/PRF1/ITK/IL2RB/GZMB/CD27/IL18R1/CD40LG/IFNG/CXCR5/BACH2/TNFRSF13C	15
DO	DOID:12177	common variable immunodeficiency	7/137	29/8007	4.19698e-07	5.4141e-05	4.84862e-05	SH2D1A/CD40LG/CD24/CD19/CD70/TNFRSF13B/TNFRSF13C	7
DO	DOID:2583	agammaglobulinemia	7/137	31/8007	6.8719e-07	5.90984e-05	5.29257e-05	SH2D1A/CD40LG/CD24/CD19/CD70/TNFRSF13B/TNFRSF13C	7
DO	DOID:620	blood protein disease	7/137	31/8007	6.8719e-07	5.90984e-05	5.29257e-05	SH2D1A/CD40LG/CD24/CD19/CD70/TNFRSF13B/TNFRSF13C	7
DO	DOID:2115	B cell deficiency	7/137	33/8007	1.08499e-06	7.22493e-05	6.47031e-05	SH2D1A/CD40LG/CD24/CD19/CD70/TNFRSF13B/TNFRSF13C	7
DO	DOID:612	primary immunodeficiency disease	15/137	196/8007	1.12014e-06	7.22493e-05	6.47031e-05	CCL5/KLRG1/SH2D1A/CD3D/IL7R/PRF1/ITK/CD3E/CD40LG/IFNG/CD24/CD19/CD70/TNFRSF13B/TNFRSF13C	15
DO	DOID:74	hematopoietic system disease	21/137	474/8007	4.9641e-05	0.00284609	0.00254882	HBB/CCL5/HBA2/BCL2/SH2D1A/LEF1/PRF1/CD8A/LTA/SOCS2/IL18R1/CD40LG/IFNG/SLC2A1/MS4A1/CD24/CD19/CD70/CD72/TNFRSF13B/TNFRSF13C	21
DO	DOID:1273	respiratory syncytial virus infectious disease	4/137	17/8007	0.000164198	0.00813865	0.00728859	CCL5/GZMA/GZMB/IFNG	4
DO	DOID:13375	temporal arteritis	5/137	32/8007	0.000189271	0.00813865	0.00728859	STAT4/IFNG/BANK1/CD24/BLK	5
DO	DOID:525	central nervous system vasculitis	5/137	32/8007	0.000189271	0.00813865	0.00728859	STAT4/IFNG/BANK1/CD24/BLK	5
DO	DOID:0050338	primary bacterial infectious disease	13/137	238/8007	0.000206732	0.00820568	0.00734862	CCL5/CD247/GZMA/BCL2/SH2D1A/IL32/PRF1/CCR7/LTA/CD27/SLAMF1/CD40LG/IFNG	13
DO	DOID:865	vasculitis	9/137	122/8007	0.000229556	0.00846077	0.00757707	STAT4/GZMB/KLRD1/TXK/CD226/IFNG/BANK1/CD24/BLK	9
DO	DOID:399	tuberculosis	10/137	156/8007	0.000325062	0.0111821	0.0100142	CCL5/CD247/GZMA/BCL2/SH2D1A/IL32/PRF1/CD27/CD40LG/IFNG	10
DO	DOID:2377	multiple sclerosis	10/137	169/8007	0.00061368	0.0197912	0.0177241	CCL5/IL7R/CCR7/CD6/GZMB/CD40LG/IFNG/PTPRCAP/CD24/EBF1	10
DO	DOID:104	bacterial infectious disease	13/137	271/8007	0.000720379	0.0218656	0.0195818	CCL5/CD247/GZMA/BCL2/SH2D1A/IL32/PRF1/CCR7/LTA/CD27/SLAMF1/CD40LG/IFNG	13
DO	DOID:3213	demyelinating disease	10/137	175/8007	0.000805195	0.0230822	0.0206714	CCL5/IL7R/CCR7/CD6/GZMB/CD40LG/IFNG/PTPRCAP/CD24/EBF1	10
DO	DOID:1398	parasitic infectious disease	9/137	150/8007	0.00104332	0.0283345	0.025375	HBB/CCL5/BCL2/IL2RB/LTA/CD40LG/IFNG/FCER2/NCR3	9
DO	DOID:3326	purpura	6/137	71/8007	0.00129366	0.0295195	0.0264363	PRF1/LTA/CD40LG/IFNG/MS4A1/CD72	6
DO	DOID:1575	rheumatic disease	10/137	188/8007	0.00139167	0.0295195	0.0264363	CD247/STAT4/CCR7/CD226/IFNG/BANK1/CD22/CD19/PIK3C2B/BLK	10
DO	DOID:418	systemic scleroderma	10/137	188/8007	0.00139167	0.0295195	0.0264363	CD247/STAT4/CCR7/CD226/IFNG/BANK1/CD22/CD19/PIK3C2B/BLK	10
DO	DOID:419	scleroderma	10/137	188/8007	0.00139167	0.0295195	0.0264363	CD247/STAT4/CCR7/CD226/IFNG/BANK1/CD22/CD19/PIK3C2B/BLK	10
DO	DOID:4960	bone marrow cancer	14/137	328/8007	0.00140474	0.0295195	0.0264363	CCND2/BCL2/LTA/SOCS2/IFNG/CD79B/CD79A/CARD11/SLC2A1/MS4A1/TNFRSF13B/TNFRSF13C/NCR3/TNFRSF17	14
DO	DOID:4481	allergic rhinitis	7/137	99/8007	0.00148092	0.0295195	0.0264363	CCL5/BCL2/ITK/CD40LG/TLR10/CLC/IFNLR1	7
DO	DOID:1036	chronic leukemia	11/137	223/8007	0.00148742	0.0295195	0.0264363	CD2/BCL2/CCR7/CD40LG/FCMR/FCER2/MS4A1/TCL1A/CXCR5/CD70/DLEU1	11
DO	DOID:2163	nasal cavity disease	7/137	101/8007	0.00166334	0.029596	0.0265048	CCL5/BCL2/ITK/CD40LG/TLR10/CLC/IFNLR1	7
DO	DOID:2825	nose disease	7/137	101/8007	0.00166334	0.029596	0.0265048	CCL5/BCL2/ITK/CD40LG/TLR10/CLC/IFNLR1	7
DO	DOID:4483	rhinitis	7/137	101/8007	0.00166334	0.029596	0.0265048	CCL5/BCL2/ITK/CD40LG/TLR10/CLC/IFNLR1	7
DO	DOID:9538	multiple myeloma	12/137	264/8007	0.00183229	0.0315155	0.0282238	CCND2/BCL2/LTA/IFNG/CD79B/CD79A/CARD11/MS4A1/TNFRSF13B/TNFRSF13C/NCR3/TNFRSF17	12
DO	DOID:1395	schistosomiasis	3/137	15/8007	0.00191771	0.0319206	0.0285865	BCL2/IFNG/FCER2	3
DO	DOID:2841	asthma	8/137	134/8007	0.00204372	0.0329551	0.029513	CCL5/BCL2/ITK/LTA/IL18R1/IL18RAP/IFNG/LAMA5	8
DO	DOID:854	collagen disease	10/137	201/8007	0.00228764	0.0357704	0.0320343	CD247/STAT4/CCR7/CD226/IFNG/BANK1/CD22/CD19/PIK3C2B/BLK	10
